# Supplementary material for: Profiling phenolic glycosides in Populus deltoides and Populus grandidentata by leaf spray ionization tandem mass spectrometry
Source: Royal Society of Chemistry journal article supplement (doi:10.1039/c4ay02639j), 2014-12-17
Supplement: c4ay02639j1.pdf [file c4ay02639j1.pdf]

## Supplementary Information

### Profiling Phenolic Glycosides in *Populus deltoides* and *Populus grandidentata* by Leaf Spray Ionization Tandem Mass Spectrometry

Dalton T. Snyder<sup>a</sup>, M. Christina Schilling<sup>a,b</sup>, Cris G. Hochwender<sup>b,c</sup>, and Arlen D.  
Kaufman<sup>a,b\*</sup>  
University of Evansville, Evansville, IN 47714, United States

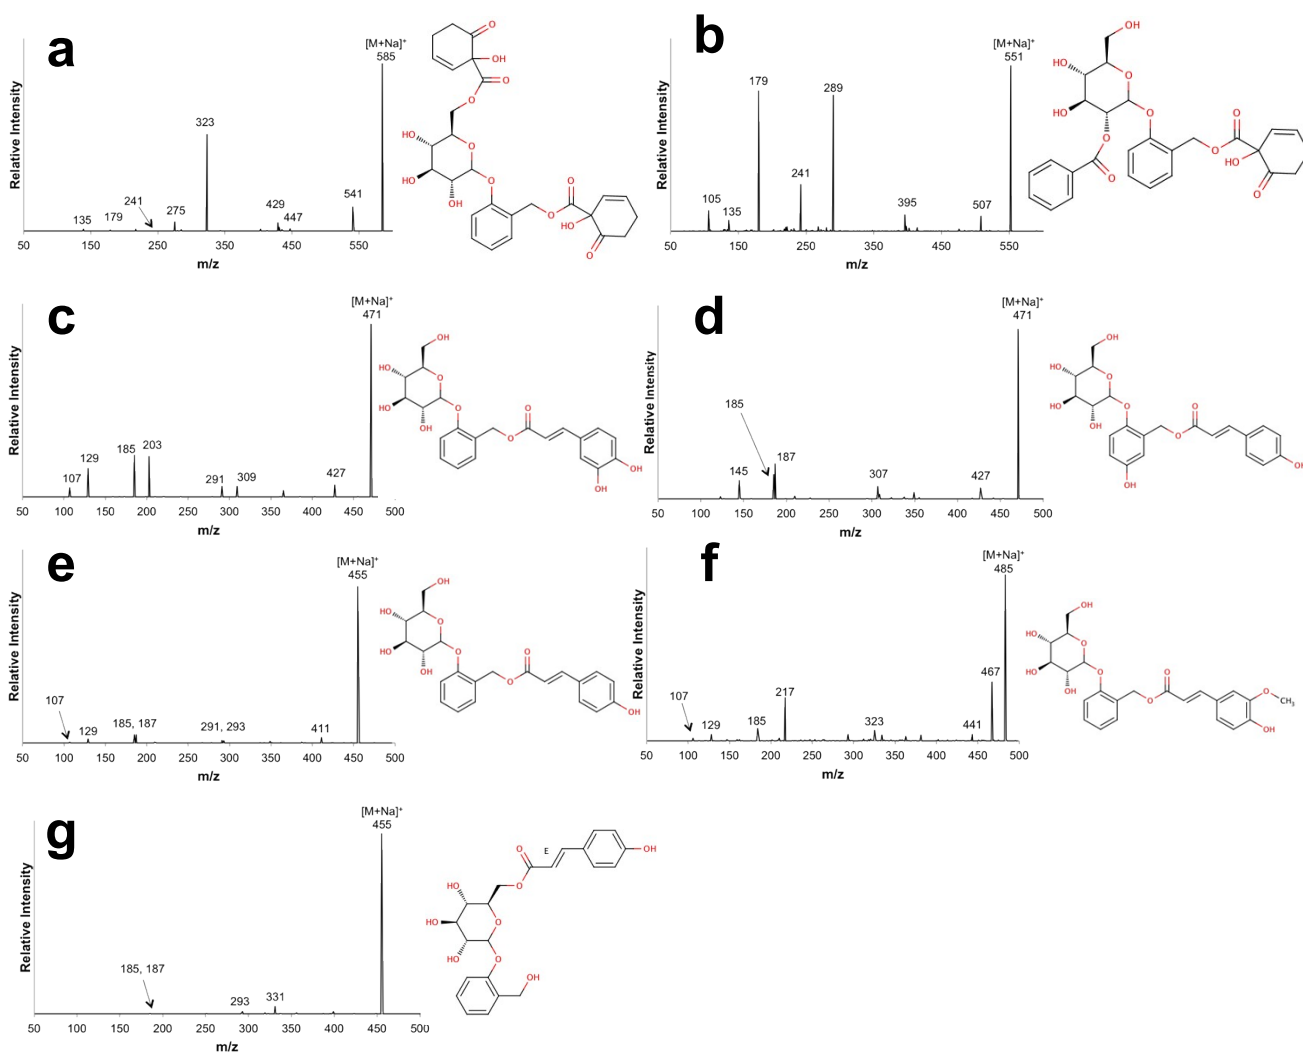

**Figure S1.** Product mass spectra of compounds identified in *Populus deltoides* by LC-MS/MS: (a) HCH salicortin, (b) tremulacin, (c) populoside, (d) populoside A, (e) populoside B, (f) populoside C (E/Z isomers), and (g) trichocarposide. Note that salicortin was also identified by LC-MS/MS.

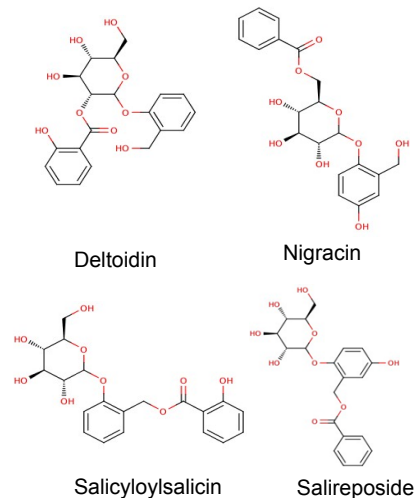

**Figure S2.** Structures of isobaric PGs with  $m/z$  of 429.

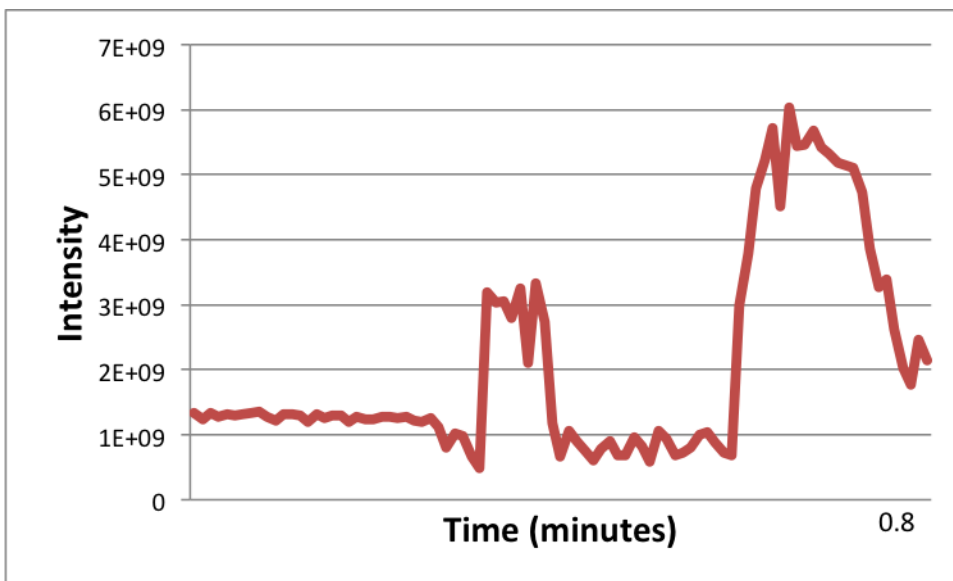

**Figure S3.** Intensity versus time for the full scan leaf spray mass spectrum of a *Populus deltoides* leaf with methanol as the solvent. The acquisition was started after application of solvent. Further application of solvent resulted in the increased responses shown.

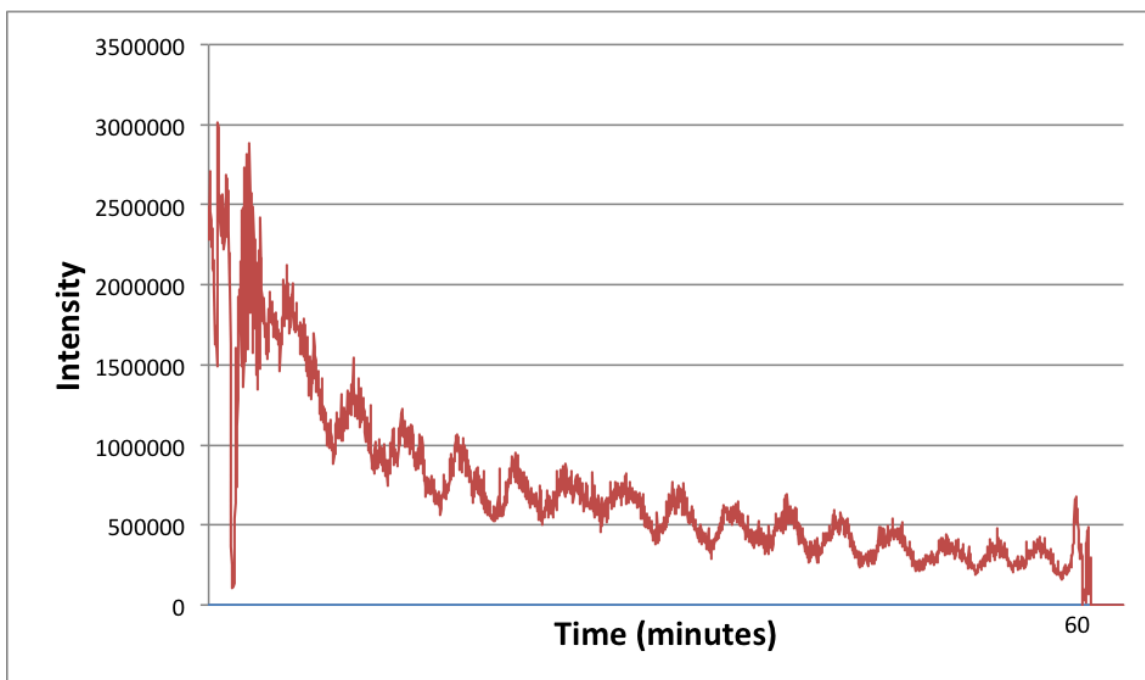

**Figure S4.** . Intensity versus time for the transition of HCH salicortin from  $m/z$  601 to  $m/z$  195. The ion source was leaf spray with the solvent (methanol) constantly supplied by a syringe pump at  $2 \mu\text{L}/\text{min}$ . The initial dip in intensity can be attributed to lack of sufficient solvent to maintain a spray. The spray was subsequently stable.
